# Supplementary material
Source: publisher site journal article supplement (https://www.dovepress.com/article/324928)
Supplement: Supplementary file 1 [file get_supplementary_file.php]

| Table S1. Parameter estimates of the stepwise multinomial logistic regression analysis for predicting subgroups of poor sleep quality in the development dataset | | | | | | |
| --- | --- | --- | --- | --- | --- | --- |
| Entrance order in the model | Reference group (Pittsburgh Sleep Quality Index < 6) | | | | | |
| Low insomnia | | High insomnia | | High hypnotics | |
| b (se) | OR (95% CI) | b (se) | OR (95% CI) | b (se) | OR (95% CI) |
| Intercept | -5.21 (0.24) |  | -17.24 (1.02) |  | -7.48 (0.38) |  |
| 1. Sleep quality | 1.96 (0.17) | 7.08 (5.56-9.92) | 5.58 (0.43) | 264.89 (114.54-612.61) | 1.67 (0.23) | 5.33 (3.40-8.36) |
| 2. Hypnotics use | 0.76 (0.07) | 2.13 (1.84-2.46) | 0.94 (0.12) | 2.55 (2.02-3.22) | 1.88 (0.10) | 6.53 (5.40-7.91) |
| 3. Sleep onset | 1.18 (0.07) | 3.27 (2.86-3.73) | 1.96 (0.17) | 7.13 (5.13-9.91) | 0.92 (0.10) | 2.50 (2.07-3.03) |
| 4. Lacking enthusiasm | 0.64 (0.31) | 1.90 (1.04-3.45) | 1.75 (0.35) | 5.72 (2.87-11.41) | 1.70 (0.33) | 5.49 (2.88-10.48) |
| 5. Sleep disruption | 0.69 (0.08) | 2.00 (1.72-2.33) | 1.15 (0.14) | 3.16 (2.40-4.17) | 0.44 (0.11) | 1.56 (1.26-1.93) |
| 6. Night pain | -0.05 (0.14) | 0.95 (0.72-1.25) | -0.09 (0.20) | 0.91 (0.61-1.36) | 0.52 (0.16) | 1.68 (1.23-2.29) |
| 7. Sleepy activities | 0.47 (0.29) | 1.61 (0.91-2.84) | 1.53 (0.34) | 4.60 (2.35-9.01) | 0.94 (0.31) | 2.55 (1.40-4.64) |
| 8. Nightmare | -0.16 (0.14) | 0.85 (0.65-1.13) | 0.003 (0.21) | 1.00 (0.67-1.50) | 0.28 (0.17) | 1.32 (0.95-1.84) |

| Table S2. Dimensional comparison of sleep quality between predicted subgroups in the validation dataset (Yilan City) | | | | | |
| --- | --- | --- | --- | --- | --- |
|  | (a) Pittsburgh Sleep Quality Index < 6* (n=654, 67.8%) | Pittsburgh Sleep Quality Index ≥ 6 | | | Omnibus *p*-value  for ANOVA |
| (b) High insomnia (n=28, 2.9%) | (c) Low insomnia (n=174, 18.0%) | (d) High hypnotics (n=108, 11.2%) |
| Mean (SD) | Mean (SD) | Mean (SD) | Mean (SD) |
| Total scores | 2.34 (1.79)b,c,d | 12.20 (4.10)a,c,d | 8.05 (3.05)a,b | 8.27 (3.58)a,b | <0.001 |
| Subjective sleep quality | 0.68 (0.54)b,c,d | 2.86 (0.36)a,c,d | 1.76 (0.46)a,b,d | 1.36 (0.50)a,b,c | <0.001 |
| Sleep latency | 0.33 (0.56)b,c,d | 2.27 (0.92)a,d | 2.11 (0.74)a,d | 1.05 (1.02)a,b,c | <0.001 |
| Sleep duration | 0.62 (0.83)b,c,d | 2.15 (1.05)a,c,d | 1.42 (1.14)a,b,d | 0.96 (1.09)a,b,c | <0.001 |
| Habitual sleep efficiency | 0.19 (0.53)b,c,d | 1.96 (1.28)a,c,d | 1.19 (1.18)a,b,d | 0.83 (1.17)a,b,c | <0.001 |
| Sleep disturbances | 0.27 (0.45)b,c,d | 1.22 (0.58)a,c,d | 0.82 (0.40)a,b | 0.73 (0.54)a,b | <0.001 |
| Use of sleep medication | 0.06 (0.37)b,c,d | 1.70 (1.41)a,c,d | 0.73 (1.19)a,b,d | 2.98 (0.14)a,b,c | <0.001 |
| Daytime dysfunction | 0.03 (0.16)b,c,d | 0.96 (0.82)a,c,d | 0.21 (0.45)a,b,d | 0.56 (0.73)a,b,c | <0.001 |
| *Each group was labeled as a‑d, respectively. Superscript numbers denote significant between-group differences in post-hoc comparisons. | | | | | |

| Table S3. Dimensional comparison of sleep quality between predicted subgroups in the validation dataset (Taipei City) | | | | | |
| --- | --- | --- | --- | --- | --- |
|  | (a) Pittsburgh Sleep Quality Index < 6* (n=97, 50.3%) | Pittsburgh Sleep Quality Index ≥ 6 | | | Omnibus *p*-value  for ANOVA |
| (b) High insomnia (n=37, 19.2%) | (c) Low insomnia (n=40, 20.7%) | (d) High hypnotics (n=19, 9.8%) |
| Mean (SD) | Mean (SD) | Mean (SD) | Mean (SD) |
| Total scores | 3.53 (1.78)b,c,d | 12.59 (3.42)a,c,d | 7.55 (1.87)a,b | 8.32 (1.97)a,b | <0.001 |
| Subjective sleep quality | 0.62 (0.56)b,c,d | 2.93 (0.26)a,c,d | 1.40 (0.50)a,b | 1.25 (0.44)a,b | <0.001 |
| Sleep latency | 0.41 (0.60)b,c,d | 2.55 (0.74)a,d | 2.21 (0.75)a,d | 1.05 (0.94)a,b,c | <0.001 |
| Sleep duration | 0.57 (0.76)b | 1.62 (1.16)a,c,d | 0.93 (0.84)b | 0.70 (0.98)b | <0.001 |
| Habitual sleep efficiency | 0.22 (0.50)b,c | 1.62 (1.21)a,c,d | 0.71 (0.89)a,b | 0.40 (0.68)b | <0.001 |
| Sleep disturbances | 1.24 (0.48)b | 1.74 (0.55)a | 1.46 (0.50) | 1.47 (0.61) | <0.001 |
| Use of sleep medication | 0.13 (0.58)b,d | 1.14 (1.42)a,c,d | 0.36 (0.91)b,d | 2.80 (0.41)a,b,c | <0.001 |
| Daytime dysfunction | 0.35 (0.58)b | 0.95 (0.94)a | 0.61 (0.67) | 0.80 (0.83) | <0.001 |
| *Each group was labeled as a-d, respectively. Superscript numbers denoted significant between-group differences in post-hoc comparisons. | | | | | |

| Table S4. Comparison of clinical outcomes between good sleepers and subgroups of participants with poor sleep quality in the validation set (Yilan City) | | | | |
| --- | --- | --- | --- | --- |
|  | (a) Pittsburgh Sleep Quality Index<6* (n=654, 67.8%) | Pittsburgh Sleep Quality Index ≥ 6 | | |
|  | (b) High insomnia (n=28, 2.9%) | (c) Low insomnia (n=174, 18.0%) | (d) High hypnotics (n=108, 11.2%) |
|  | Mean (SD) | Mean (SD) | Mean (SD) | Mean (SD) |
| Athens Insomnia Scale | 0.32 (1.26)b,c,d | 9.00 (3.52)a,c,d | 4.50 (3.89)a,b,d | 3.54 (3.51)a,b,c |
| Epworth Sleepiness Scale | 2.79 (3.89) | 3.52 (4.52) | 3.19 (4.43) | 3.69 (5.27) |
| Number of physical diseases | 1.39 (1.32)d | 1.78 (1.48)a | 1.61 (1.33)d | 2.07 (1.35)a,c |
| Hospital Anxiety and Depression Scale |  |  |  |  |
| Depression subscale | 2.40 (2.89)b,c,d | 5.32 (4.91)a,c | 3.58 (3.65)a,b,d | 4.81 (3.99)a,c |
| Anxiety subscale | 2.13 (2.72)b,c,d | 6.07 (4.22)a,c,d | 3.48 (3.20)a,b | 4.23 (3.77)a,b |
| Short-form 12 |  |  |  |  |
| Mental health composite scores | 58.49 (6.35)b,c,d | 47.99 (10.52)a,c,d | 56.60 (8.95)a,b,d | 52.96 (9.32)a,b,c |
| Physical health composite scores | 50.80 (8.06)b,c,d | 40.44 (12.67)a | 44.75 (10.36)a | 43.36 (9.41)a |
| Groningen Activity Restriction Scale | 20.65 (8.84)b,c,d | 30.36 (12.92)a,c | 23.67 (12.13)a,b | 26.91 (12.16)a |
| Hand grip strength (kg) | 23.77 (8.76)b,c,d | 15.41 (6.01)a,c | 20.46 (7.95)a,b | 18.53 (8.80)a |
| *Each group was labeled as a‑d, respectively. Superscript numbers denote significant between-group differences in post-hoc comparisons. | | | | |
